# Supplementary material
Source: Springer Nature journal article supplement (https://www.springermedizin.de/resource/supplementary/13011_2009_120_MOESM1_ESM.pdf/9628454)
Supplement: MOESM1 [file 9628454]

Pregnant smokers identified  
in areas with specialist  
services in 2006 table 2(1) **6,128(100%)**

Pregnant smokers referred  
to specialist smoking  
cessation services table 2(1) **3,133(51%)**

Pregnant smokers engaged  
by having at least one face  
to face contact with specialist  
smoking cessation services  
table 2(2) **763(14%)**

Pregnant smokers who set  
a quit date table 2(1) **779(13%)**

Self-report quit 4 weeks  
post quit date table 2(1) **236(4%)**
